# Supplementary material for: Integrated Metabolome and Transcriptome Analysis Reveals a Regulatory Network of Fruit Peel Pigmentation in Eggplant (Solanum melongena L.)
Source: MDPI journal article supplement (doi:10.3390/ijms232113475), 2022-11-03
Supplement: s1 [file s1]

## Supplementary materials

### Supplementary Table S1. DEGs identified in the pair-wise comparisons

### Supplementary Table S2. DEGs related to light-harvesting chlorophyll protein complex

| ID            | annotation | A1_FPKM | A2_FPKM | A3_FPKM | A4_FPKM | A5_FPKM |
|---------------|------------|---------|---------|---------|---------|---------|
| Smechr0500697 | Lhca1      | 423.39  | 582.08  | 268.39  | 26.85   | 25.88   |
| Smechr0500699 | Lhca1      | 33.26   | 38.92   | 14.29   | 2.62    | 2.68    |
| Smechr0400151 | Lhca2      | 206.07  | 274.72  | 140.28  | 19.67   | 11.11   |
| Smechr1200202 | Lhca2      | 0.58    | 14.68   | 0.34    | 0.00    | 0.02    |
| Smechr0400296 | Lhca3      | 153.72  | 237.91  | 121.20  | 15.87   | 9.53    |
| Smechr0303053 | Lhca4      | 286.63  | 350.87  | 145.82  | 18.38   | 10.73   |
| Smechr0701037 | Lhca5      | 17.17   | 42.56   | 21.35   | 10.71   | 7.75    |
| Smechr0801141 | Lhcb1      | 68.68   | 101.22  | 16.88   | 0.06    | 0.05    |
| Smechr0801142 | Lhcb1      | 2358.65 | 3117.48 | 1297.21 | 31.87   | 7.02    |
| Smechr1000379 | Lhcb3      | 209.30  | 166.36  | 88.26   | 9.19    | 3.01    |
| Smechr0900664 | Lhcb4      | 274.51  | 237.36  | 148.14  | 22.85   | 9.73    |
| Smechr0602085 | Lhcb5      | 109.34  | 158.79  | 115.57  | 10.11   | 5.11    |
| Smechr0100613 | Lhcb6      | 72.55   | 151.10  | 65.22   | 1.79    | 0.56    |
| Smechr0100616 | Lhcb6      | 90.47   | 101.71  | 56.47   | 4.19    | 2.59    |
| Smechr0402609 | Lhcb7      | 14.79   | 11.91   | 8.23    | 8.82    | 4.82    |

### Supplementary Table S3. Primers used for quantitative real-time PCR (qRT-PCR)

| Genes         | Forward primer (5' to 3') | Reverse primer ((5' to 3') |
|---------------|---------------------------|----------------------------|
| Smechr0702290 | TCATCCGACGAATGTTTTCA      | GTCCCGAAGTGTTGTTGGAT       |
| Smechr0802143 | CCCAATTTACCACGGTGTTTC     | CAGCCATTTCAGGTGTAGCA       |
| Smechr0802451 | CGGCGAGTAAGCTAAAGGTG      | ATAGCCGCGTGGTCATAAAC       |
| Smechr0900664 | GATTCGGATTTCGGACAGAAA     | ATCCGTAGTCACCGACAAGG       |
| Smechr1001846 | AAGCCAGAAGCAGATGTCGT      | AGCTGCACCTCCAGCTACAT       |
| Smechr1002423 | GATGGGGCAGTTACTTGGA       | CTGGACCCAAAGTTCGTGAT       |
| Smechr1200635 | CCCTCTTGATCTTGCTCAG       | CTGCAGGTGGATCATTTCT        |
| Smechr1002213 | AGTGGCATCTTGTTCTGCT       | CCGAAGCAAAGTCACCTCTC       |
| Smechr1002420 | GGCCAGATTGCTGAAATTGT      | GGCATTGCCTAGAGTTGCTC       |
| Smechr1002081 | GGTGGACCACAAACAATGAA      | GCTGAAATTTCTCCCCATGA       |
| Smechr0400031 | ACAGGAGGTGCAGGCTACAT      | TTCATCTGCACCACTGAAGC       |
| Smechr0401078 | TGGCCTAAAAACCCTCCTTT      | CAGCTGCCTCAATCATTTCA       |
| Smechr0303487 | CATTGTGGACGTTTCTGTGG      | TGCATTGGATTGTTCTTGGA       |
| Smechr0500713 | GTTTTGCCCAAGGAGATTGA      | AGCCCCTAATTCTTCCCTCA       |
| Smechr0302347 | TTCGAGATAGGTGCGCTTTT      | GCTTGCGGGACTCTTCTATG       |
| Smechr0601814 | TCTTTTGCACCCCCAGATAG      | CCACCCACTTGGACTTTGTT       |
| GAPDH         | CCGCTCCTAGCAAAGATGCC      | ACCCTCCACAATGCCAAACC       |

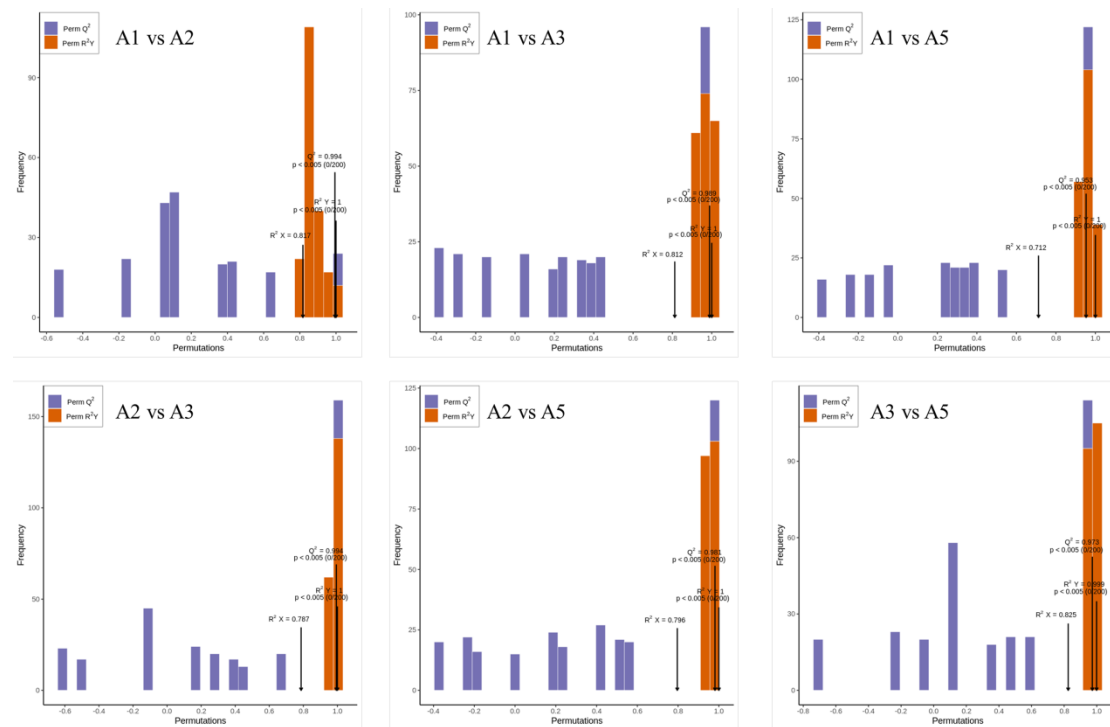

Supplementary Figure S1. Orthogonal partial least squares discriminant analysis (OPLS-DA) model of comparison groups including A1 vs. A2, A1 vs. A3, A1 vs. A5, A2 vs. A3, A2 vs. A5, and A3 vs. A5.

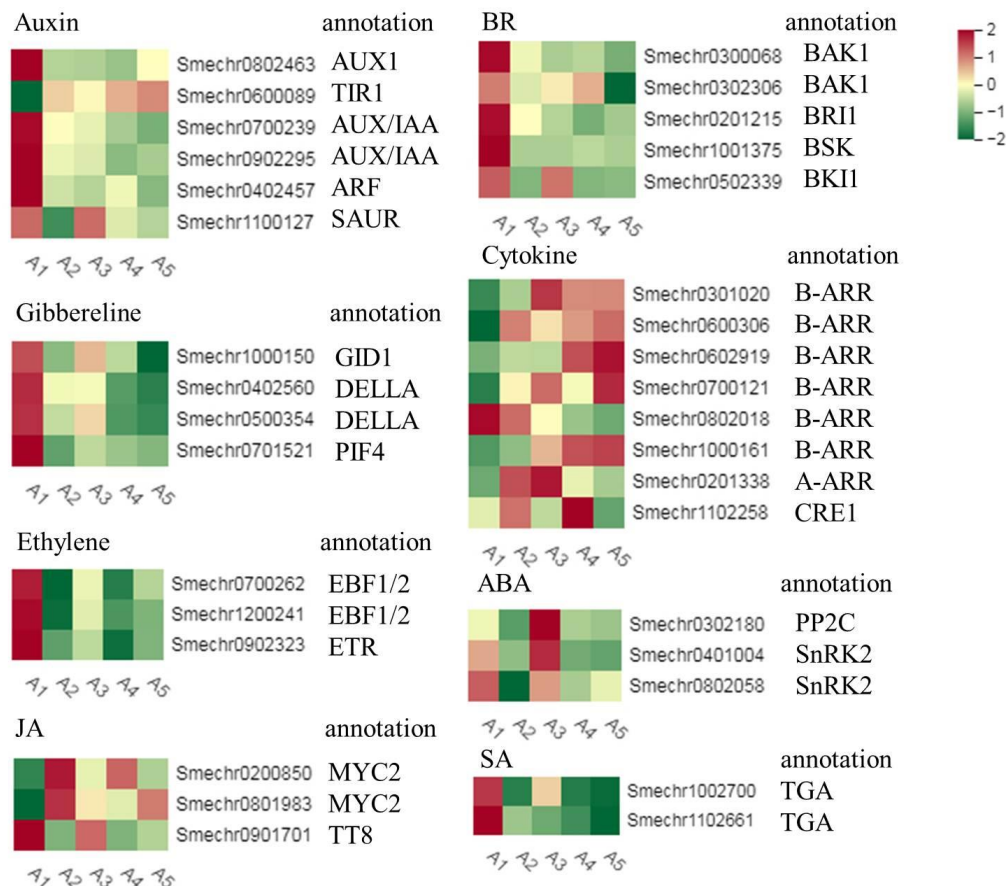

Supplementary Figure S2. Differentially expressed genes involved in plant hormone transduction.

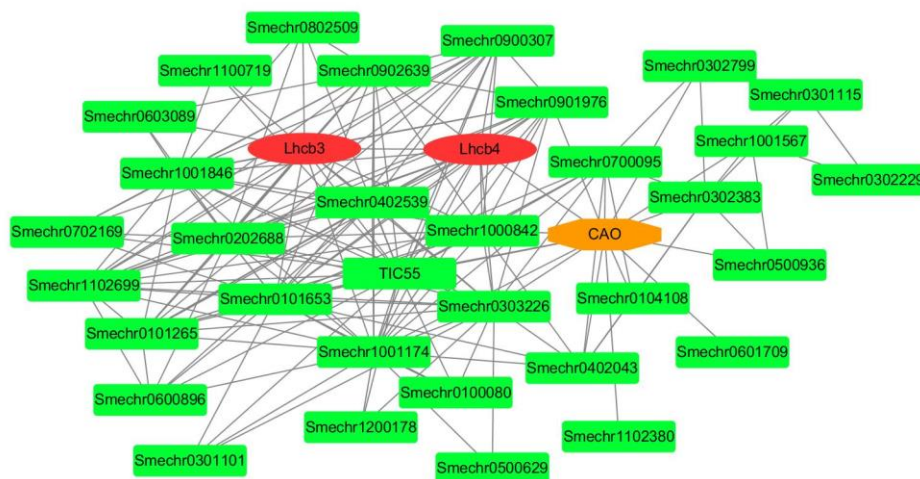

Supplementary Figure S3. Gene network of the hub genes in the violet module, which positively correlated with total chlorophyll content ( $r^2=0.94$ ,  $p=1 \times 10^{-7}$ ).

|           |                                              |                 |
|-----------|----------------------------------------------|-----------------|
| A1        | MNNPPIICTSVRVRKGSWTEEDLLLRCMEKYGEGKWHLPARA   | GLNRCRKSCRLRWLN |
| A2        | MNNPPIICTSVRVRKGSWTEEDLLLRCMEKYGEGKWHLPAA    | GLNRCRKSCRLRWLN |
| A3        | MNNPPIICTSVRVRKGSWTEEDLLLRCMEKYGEGKWHLPARA   | GLNRCRKSCRLRWLN |
| A4        | MNNPPIICTSVRVRKGSWTEEDLLLRCMEKYGEGKWHLPAA    | GLNRCRKSCRLRWLN |
| A5        | MNNPPIICTSVRVRKGSWTEEDLLLRCMEKYGEGKWHLPARA   | GLNRCRKSCRLRWLN |
| green1    | MNNPPIICTSVRVRKGSWTEEDLLLRCMEKYGEGKWHLPAA    | GLNRCRKSCRLRWLN |
| green2    | MNNPPIICTSVRVRKGSWTEEDLLLRCMEKYGEGKWHLPAA    | GLNRCRKSCRLRWLN |
| green3    | MNNPPIICTSVRVRKGSWTEEDLLLRCMEKYGEGKWHLPAA    | GLNRCRKSCRLRWLN |
| purple1   | MNNPPIICTSVRVRKGSWTEEDLLLRCMEKYGEGKWHLPARA   | GLNRCRKSCRLRWLN |
| purple2   | MNNPPIICTSVRVRKGSWTEEDLLLRCMEKYGEGKWHLPARA   | GLNRCRKSCRLRWLN |
| purple3   | MNNPPIICTSVRVRKGSWTEEDLLLRCMEKYGEGKWHLPARA   | GLNRCRKSCRLRWLN |
| white1    | MNNPPIICTSVRVRKGSWTEEDLLLRCMEKYGEGKWHLPAA    | GLNRCRKSCRLRWLN |
| white2    | MNNPPIICTSVRVRKGSWTEEDLLLRCMEKYGEGKWHLPAA    | GLNRCRKSCRLRWLN |
| white3    | MNNPPIICTSVRVRKGSWTEEDLLLRCMEKYGEGKWHLPAA    | GLNRCRKSCRLRWLN |
| Consensus | mnnppiictsvrvrkgswteeedlllrkcmekeygegkwhlpaa | glnrcrkscrlrwln |

Supplementary Figure S4. Sequence variation of *SmMYB113* among white, green and purple fruit of eggplant.
